# Supplementary material for: A multi-spectroscopic approach to investigate the interactions between Gramicidin A and silver nanoparticles
Source: Royal Society of Chemistry journal article supplement (doi:10.1039/c9sm01110b), 2019-01-01
Supplement: c9sm01110b1.pdf [file c9sm01110b1.pdf]

## Supplementary Information

### **A multi-spectroscopic approach to investigate the interactions between Gramicidin A and silver nanoparticles**

Marta Gambucci, Pier Luigi Gentili, Paola Sassi, Loredana Latterini \*

*Department of Chemistry, Biology and Biotechnology, University of Perugia, Via Elce di Sotto, 8-06123 Perugia, Italy.*

**Ag content through ICP analysis and determination of D-AgNPs concentrations in the colloidal samples.**

**Table S1:** ICP data

| [Ag] (ppm) <sup>a</sup> | [Ag] (M)               | [Ag] <sub>0</sub> (M) <sup>b</sup> | [AgNPs] (M)          |
|-------------------------|------------------------|------------------------------------|----------------------|
| 0.25856                 | 2.396*10 <sup>-6</sup> | 9.588*10 <sup>-4</sup>             | 1.8*10 <sup>-7</sup> |

<sup>a</sup> Obtained from ICP measurements.

<sup>b</sup> [Ag] in the AgNP initial solution.

*Determination of AgNP concentration*

(a) Volume of one silver atom ( $V_{Ag}$ ) :

$$V_{Ag} = \frac{4}{3}\pi r_{Ag}^3$$

$r_{Ag}$  : metallic radius of a silver atom (in m)

(b) Volume of one silver nanoparticle ( $V_{particle}$ ) :

$$V_{particle} = \frac{4}{3}\pi r_{particle}^3$$

$r_{particle}$ : average radius obtained from TEM analysis (in m)

(c) Number of silver atoms for particle ( $N_{atoms}$ ) :

$$N_{atoms} = \frac{V_{particle}}{V_{Ag}}$$

(d) AgNPs concentration ([AgNPs]) :

$$[AgNPs] = \frac{[Ag]_0}{N_{atoms}}$$



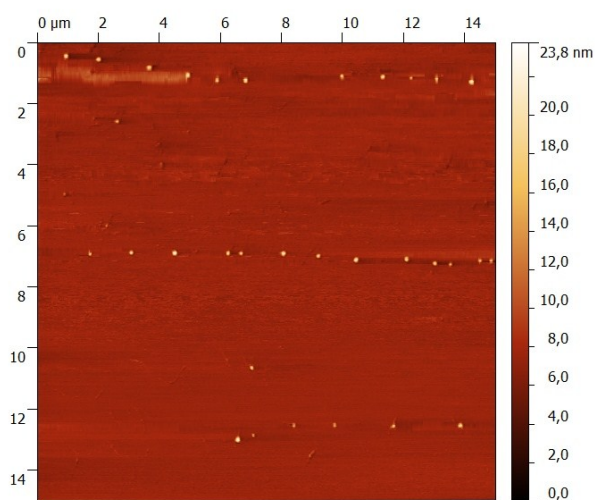

**Figure S1:** AFM image of D-AgNPs (15x15 μm).

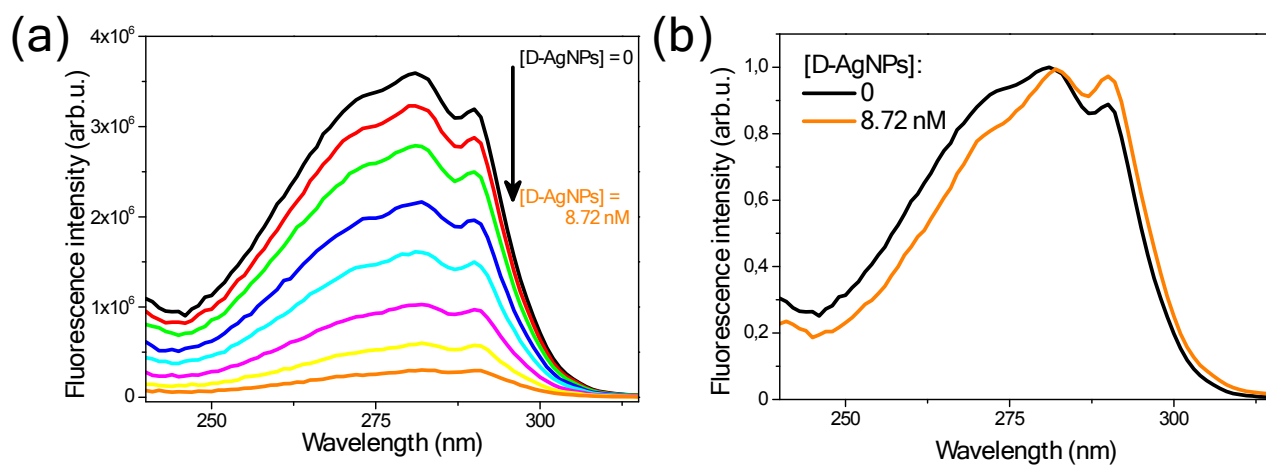

**Figure S2:** (a) Excitation spectra ( $\lambda_{em} = 335 \text{ nm}$ ) of GramA in EtOH in the presence of increasing concentrations of D-AgNPs (0 to 8.72 nM); (b) normalized excitation spectra of GramA (black line) and GramA + 8.72 nM of D-AgNPs (orange line).

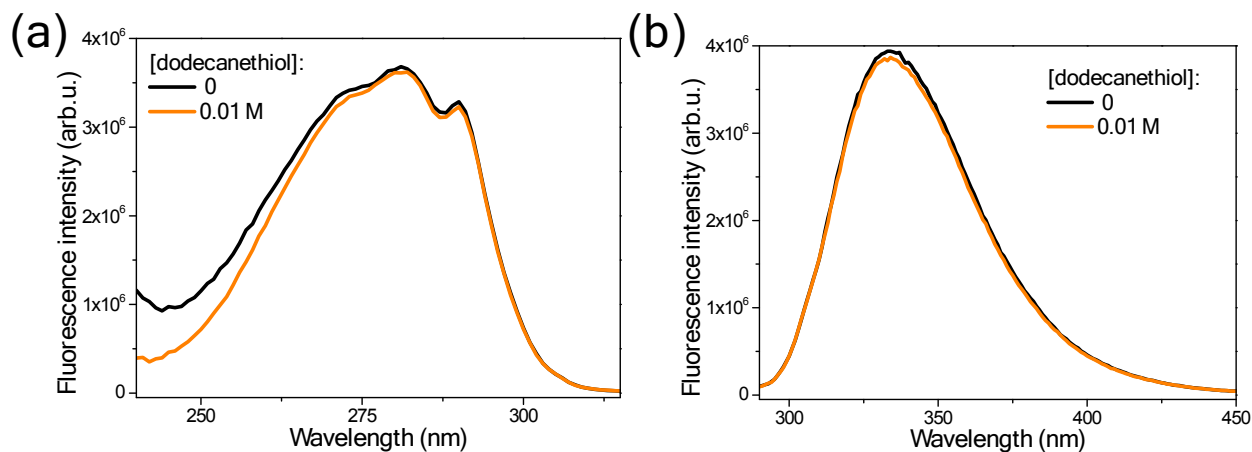

**Figure S3:** (a) Excitation spectra ( $\lambda_{em} = 335$  nm) of GramA (black line) and GramA + 0.01 M of dodecanethiol (orange line); (b) emission spectra ( $\lambda_{exc} = 280$  nm) of GramA (black line) and GramA + 0.01 M of dodecanethiol (orange line).

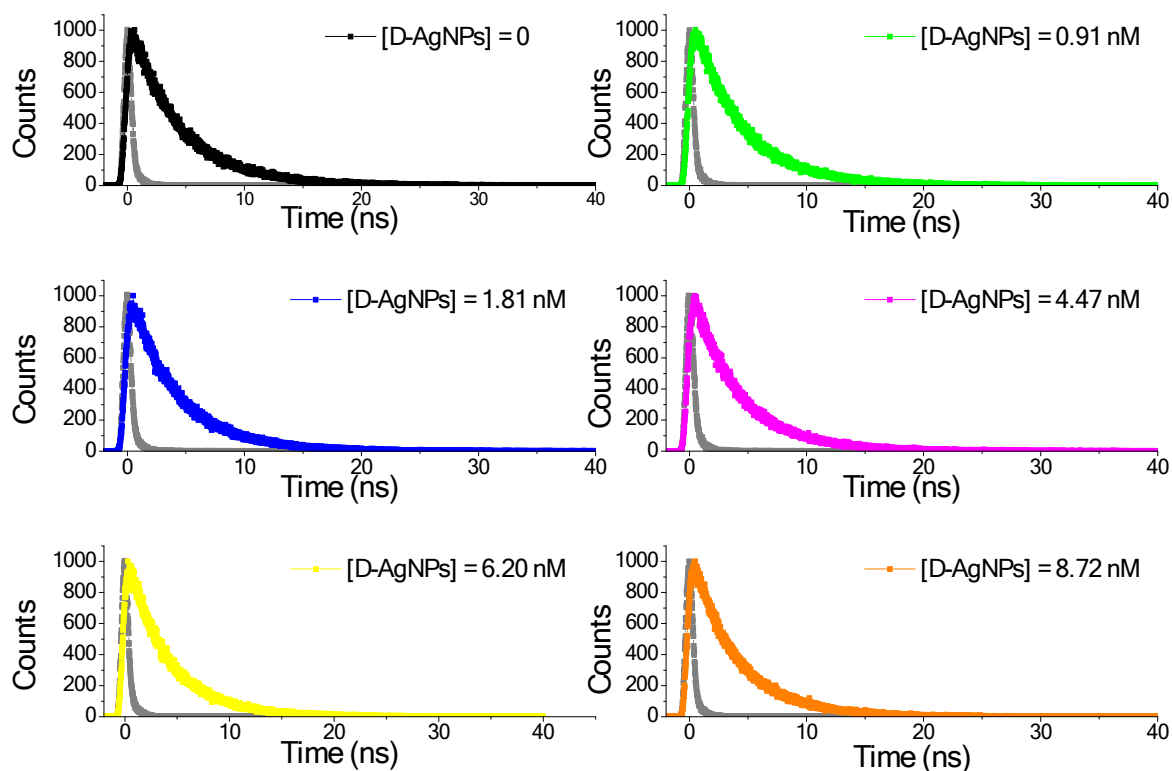

**Figure S4:** Fluorescence decay kinetics of GramA in EtOH solution in the presence of increasing amounts of D-AgNPs.

**Table S2:** Fluorescence decay times (obtained through nonlinear least-squares error minimization analysis) of GramA in the presence of increasing amounts of D-AgNPs.

| D-AgNPs concentration (nM) | $\tau_i$ GramA at 335 nm (ns) |                      | ChiSQ  | $\bar{\tau}_{w.a.}$ (ns) |
|----------------------------|-------------------------------|----------------------|--------|--------------------------|
| --                         | $4.38 \pm 0.01$ (95%)         | $1.2 \pm 0.1$ (5%)   | 1.0773 | 4.22                     |
| <b>0.91</b>                | $4.23 \pm 0.01$ (95%)         | $1.2 \pm 0.1$ (5%)   | 0.9811 | 4.08                     |
| <b>1.81</b>                | $4.26 \pm 0.01$ (92%)         | $0.4 \pm 0.1$ (8%)   | 1.0430 | 3.95                     |
| <b>4.47</b>                | $4.07 \pm 0.01$ (95%)         | $0.7 \pm 0.1$ (5%)   | 1.0518 | 3.90                     |
| <b>6.20</b>                | $4.07 \pm 0.01$ (94%)         | $0.78 \pm 0.01$ (6%) | 1.0621 | 3.87                     |
| <b>8.72</b>                | $3.98 \pm 0.01$ (94%)         | $0.74 \pm 0.08$ (6%) | 0.9813 | 3.78                     |

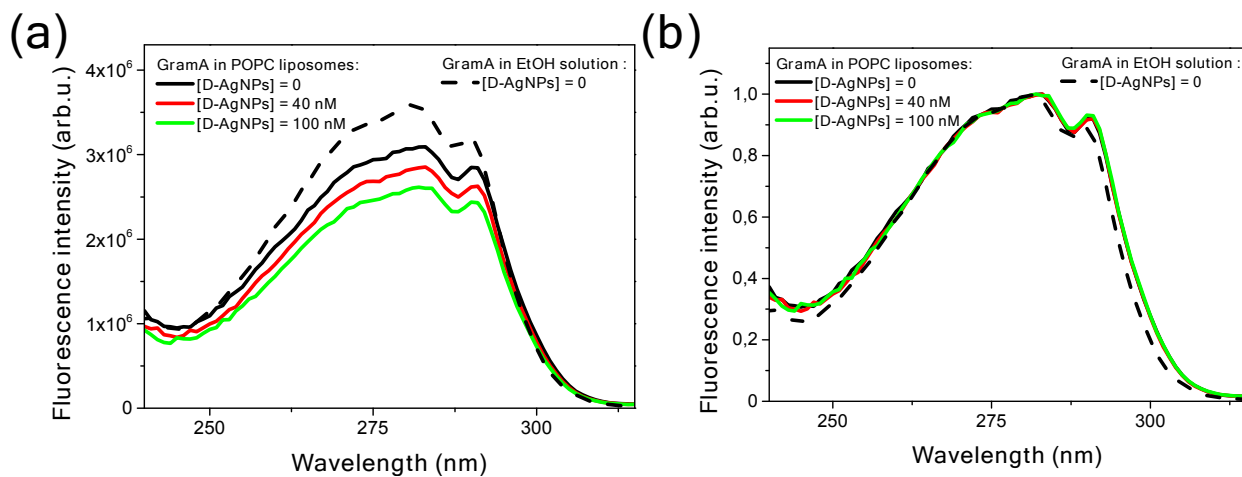

**Figure S5:** (a) Excitation spectra ( $\lambda_{em}=335$  nm) and (b) normalized excitation spectra of GramA into POPC bilayers without D-AgNPs (black solid line) and with increasing concentrations of D-AgNPs (red line: [D-AgNPs] = 40 nM; green line: [D-AgNPs] = 100 nM). For reference, GramA emission spectrum in EtOH is also reported (black dashed line).

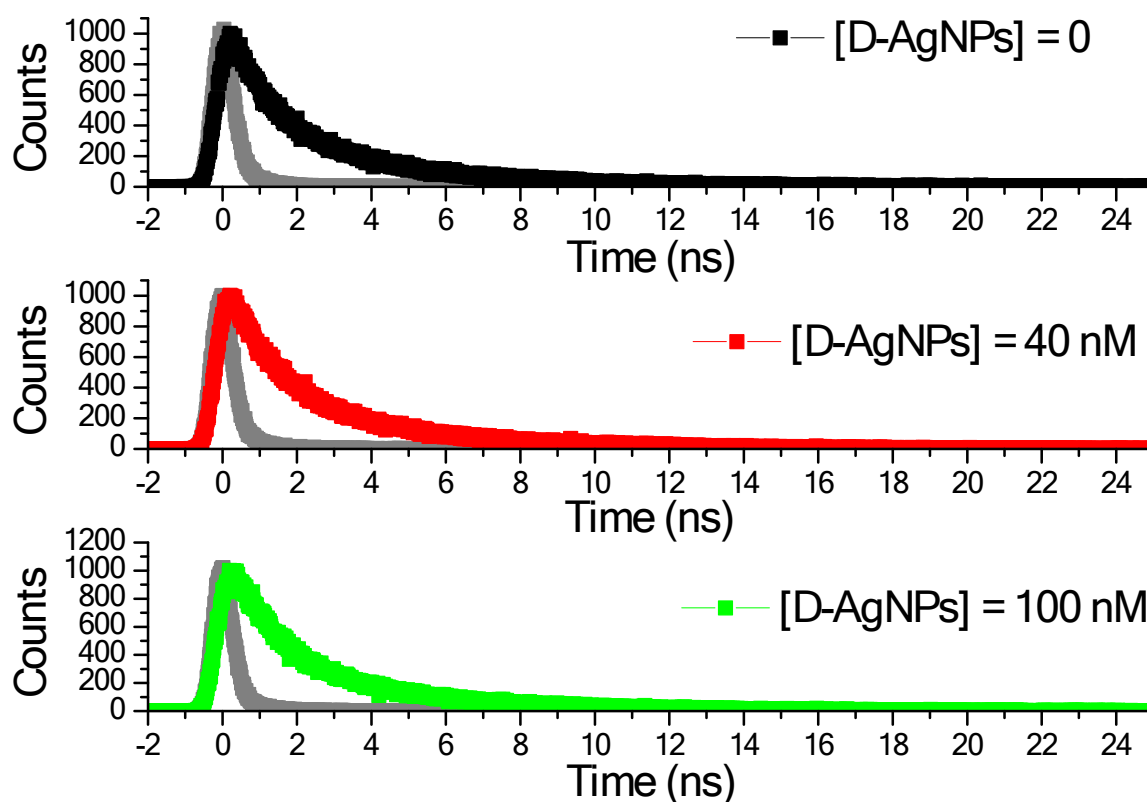

**Figure S6:** Fluorescence decay kinetics of GramA in POPC liposomes in the presence of increasing amounts of D-AgNPs.

**Table S3:** Fluorescence decay times (obtained through nonlinear least-squares error minimization analysis) of GramA in POPC liposomes in the presence of increasing amounts of D-AgNPs.

| D-AgNPs concentration (nM) | $\tau_i$ GramA at 335 nm (ns) |                       | ChiSQ  | $\bar{\tau}_{w.a.}$ (ns) |
|----------------------------|-------------------------------|-----------------------|--------|--------------------------|
| --                         | $3.54 \pm 0.02$ (69%)         | $0.74 \pm 0.02$ (31%) | 1.0074 | 2.67                     |
| 40                         | $3.69 \pm 0.02$ (65%)         | $0.86 \pm 0.02$ (35%) | 0.9701 | 2.70                     |
| 100                        | $3.67 \pm 0.02$ (63%)         | $1.01 \pm 0.02$ (37%) | 1.0562 | 2.68                     |

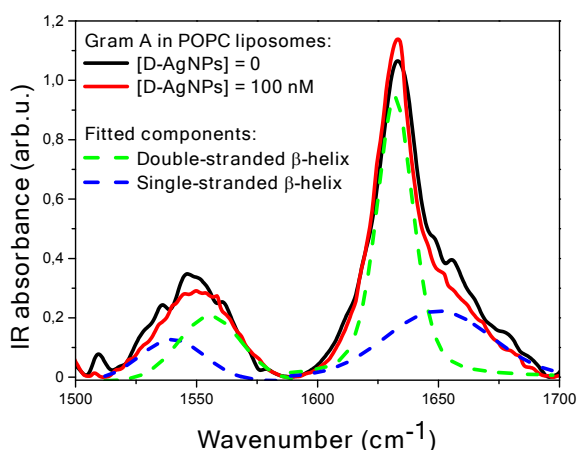

**Figure S7:** Normalized ATR-FTIR spectra in the amide I and II region ( $1500\text{-}1700\text{ cm}^{-1}$ ) of POPC liposomes containing GramA (black line) and POPC liposomes containing GramA and D-AgNPs (red line). Dashed lines show the curve fitting results for the black curve for double stranded helix contribution (green dashed line) and single stranded helix contribution (blue dashed line).

**Table S4:** Curve fitting results for amide I and II bands of GramA in POPC from the ATR-FTIR spectra.

| Literature assignments                                               |                               |                               |          |                               |                               |
|----------------------------------------------------------------------|-------------------------------|-------------------------------|----------|-------------------------------|-------------------------------|
|                                                                      | Single-stranded               | Double-stranded               |          | Single-stranded               | Double-stranded               |
| Amide I                                                              | $\approx 1650\text{ cm}^{-1}$ | $\approx 1630\text{ cm}^{-1}$ | Amide II | $\approx 1540\text{ cm}^{-1}$ | $\approx 1560\text{ cm}^{-1}$ |
| Curve-fitting results (areas in percentage) for experimental results |                               |                               |          |                               |                               |
| GramA                                                                | 45%                           | 55%                           |          | 46%                           | 54%                           |
| + 100 nM D-AgNPs                                                     | 36%                           | 64%                           |          | 40%                           | 60%                           |
